# Supplementary material for: Application of novel triarylmethane dyes having thienyl, thieno[3,2-b]thienyl, and dithieno[3,2-b:2′,3′-d]thienyl rings as auxochromes to super acid pH sensors
Source: Royal Society of Chemistry journal article supplement (doi:10.1039/c6ra00915h), 2016-01-01
Supplement: c6ra00915h1.pdf [file c6ra00915h1.pdf]

## Electronic Supplementary Information

### Application of novel triarylmethane dyes having thienyl, thieno[3,2-*b*]thienyl, and dithieno[3,2-*b*:2',3'-*d*]thienyl rings as auxochrome to superacid pH sensor

Masaki Matsui,\* Kenta Kakitani, Yasuhiro Kubota,  
Kazumasa Funabiki and Masaru Ishida

*Department of Chemistry and Biomolecular Science,  
Faculty of Engineering, Gifu University, Yanagido, Gifu 501-1193, Japan*

Figure S1. <sup>1</sup>H NMR of **5-OH**.

Figure S1'. <sup>1</sup>H NMR of **5-OH**.

Figure S2. <sup>1</sup>H NMR of **6-OH**.

Figure S2'. <sup>1</sup>H NMR of **6-OH**.

Figure S3. <sup>1</sup>H NMR of **7-OH**.

Figure S3'. <sup>1</sup>H NMR of **7-OH**.

Figure S4. <sup>1</sup>H NMR of **5-BF<sub>4</sub>**.

Figure S4'. <sup>1</sup>H NMR of **5-BF<sub>4</sub>**.

Figure S5. <sup>1</sup>H NMR of **5-CF<sub>3</sub>SO<sub>3</sub>**.

Figure S5'. <sup>1</sup>H NMR of **5-CF<sub>3</sub>SO<sub>3</sub>**.

Figure S6. <sup>1</sup>H NMR of **5-(C<sub>4</sub>F<sub>9</sub>SO<sub>2</sub>)<sub>2</sub>N**.

Figure S6'. <sup>1</sup>H NMR of **5-(C<sub>4</sub>F<sub>9</sub>SO<sub>2</sub>)<sub>2</sub>N**.

Figure S7. <sup>1</sup>H NMR of **6-(C<sub>4</sub>F<sub>9</sub>SO<sub>2</sub>)<sub>2</sub>N**.

Figure S7'. <sup>1</sup>H NMR of **6-(C<sub>4</sub>F<sub>9</sub>SO<sub>2</sub>)<sub>2</sub>N**.

Figure S8.  $^1\text{H}$  NMR of **7-(C<sub>4</sub>F<sub>9</sub>SO<sub>2</sub>)<sub>2</sub>N**.

Figure S8'.  $^1\text{H}$  NMR of **7-(C<sub>4</sub>F<sub>9</sub>SO<sub>2</sub>)<sub>2</sub>N**.

Figure S9.  $^1\text{H}$  NMR of **CV-(C<sub>4</sub>F<sub>9</sub>SO<sub>2</sub>)<sub>2</sub>N**.

Figure S9'.  $^1\text{H}$  NMR of **CV-(C<sub>4</sub>F<sub>9</sub>SO<sub>2</sub>)<sub>2</sub>N**.

Figure S10.  $^1\text{H}$  NMR of **5-OEt**.

Figure S10'.  $^1\text{H}$  NMR of **5-OEt**.

Figure S10''.  $^1\text{H}$  NMR of **5-OEt**.

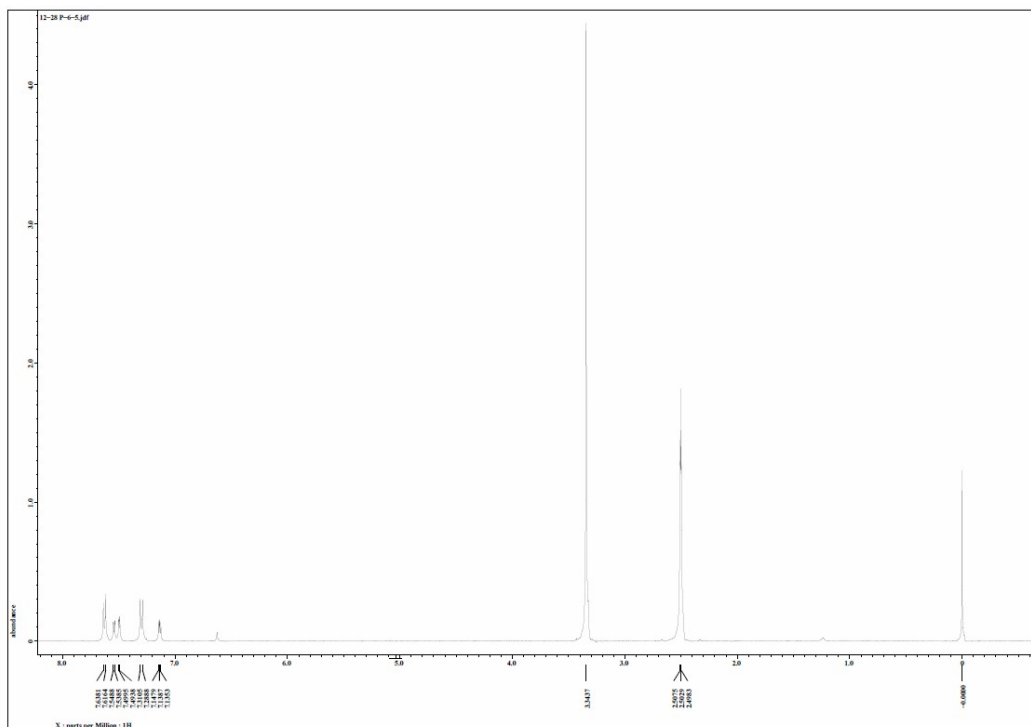

Figure S1.  $^1\text{H}$  NMR of 5-OH. □□□

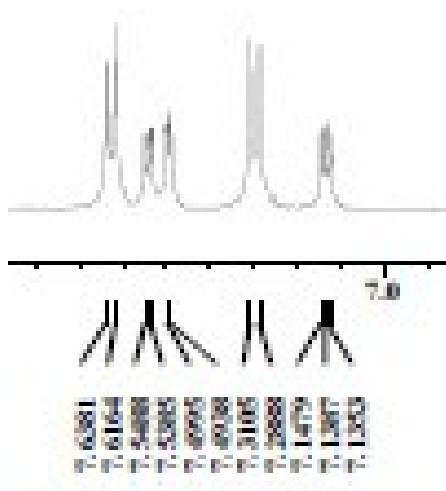

Figure S1'.  $^1\text{H}$  NMR of 5-OH. □□□

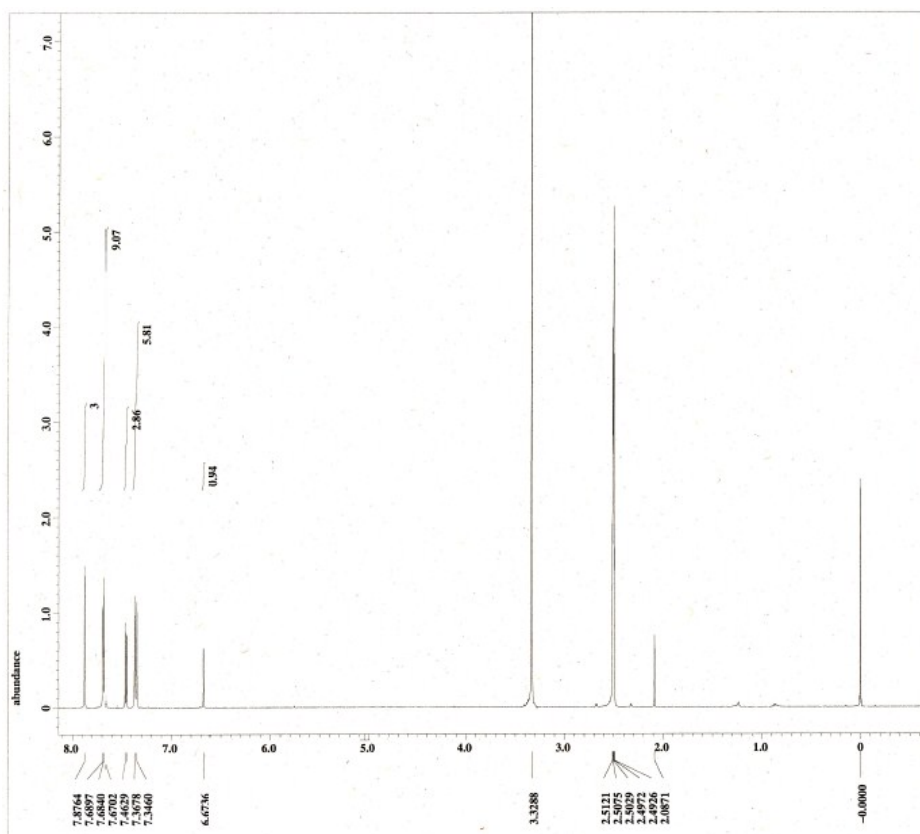

Figure S2.  $^1\text{H}$  NMR of 6-OH.

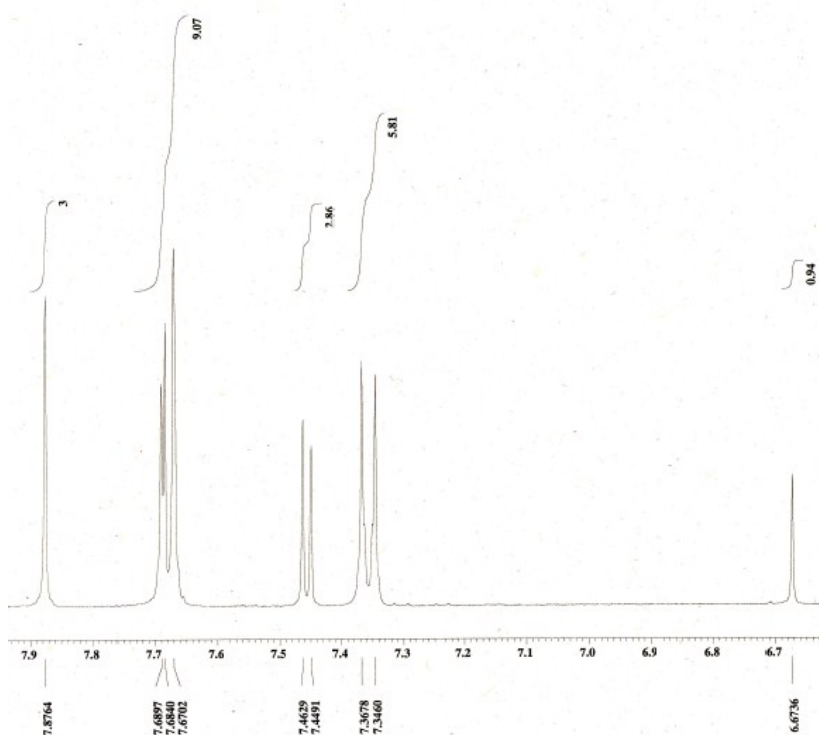

Figure S2'.  $^1\text{H}$  NMR of 6-OH.

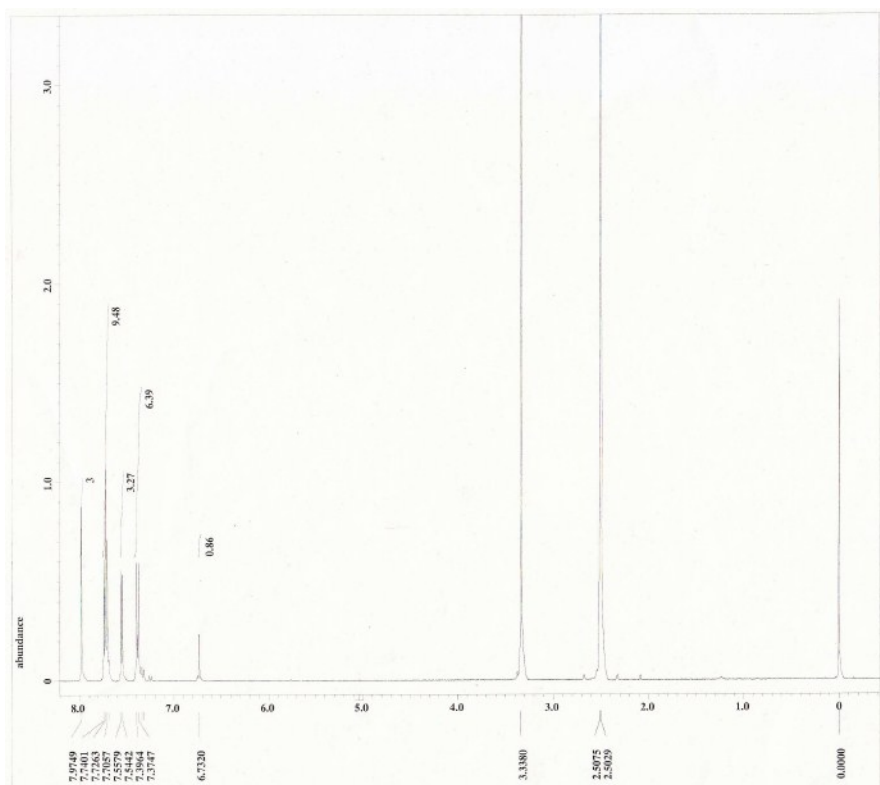

Figure S3. <sup>1</sup>H NMR of 7-OH.

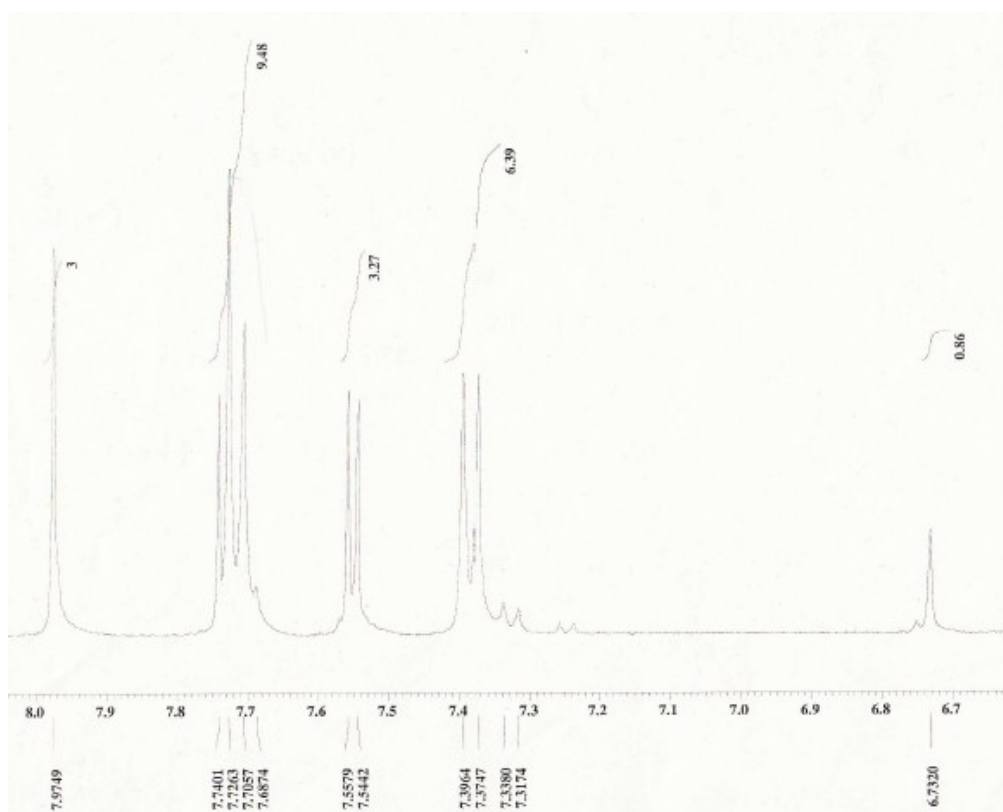

Figure S3'. <sup>1</sup>H NMR of 7-OH.

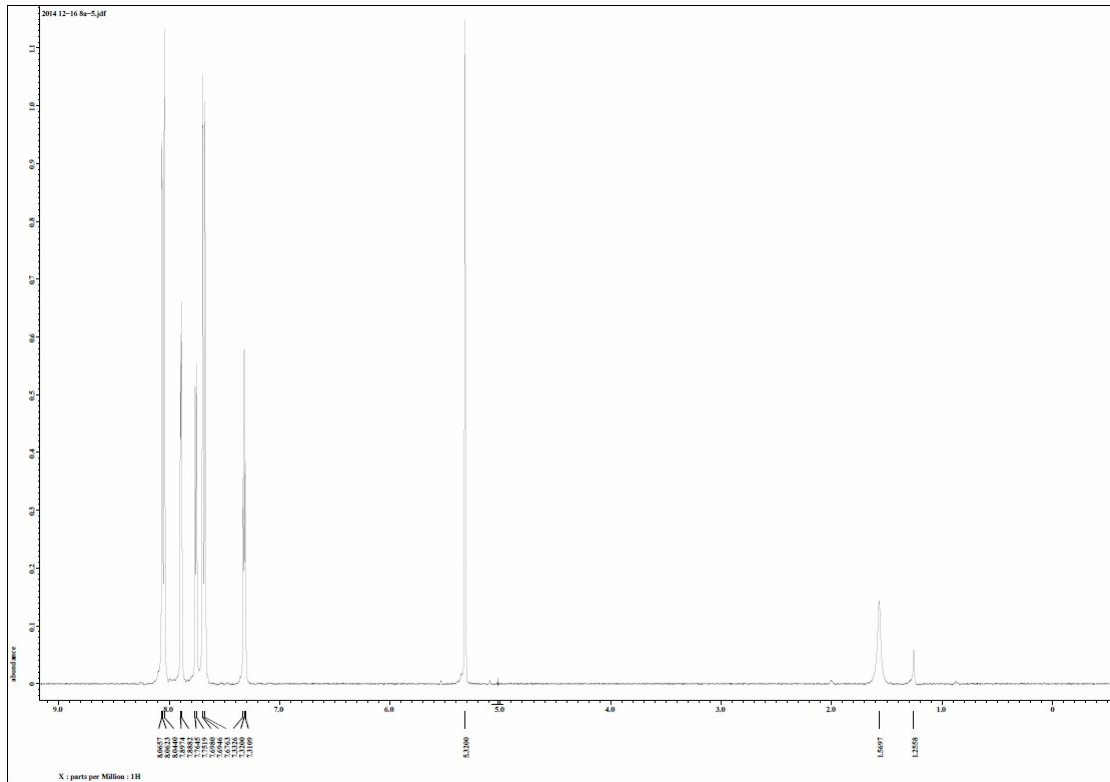

Figure S4.  $^1\text{H}$  NMR of **5-BF<sub>4</sub>**.

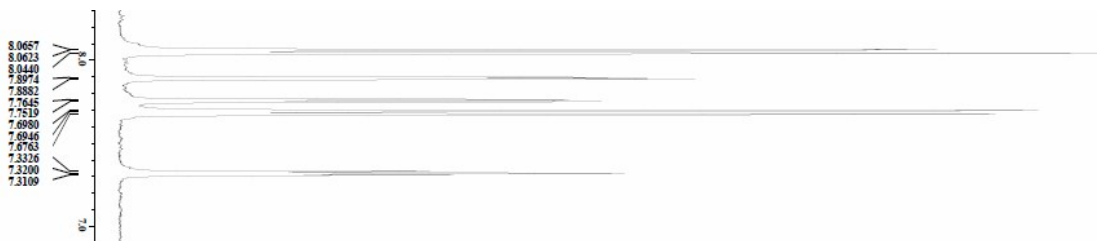

Figure S4'.  $^1\text{H}$  NMR of **5-BF<sub>4</sub>**.

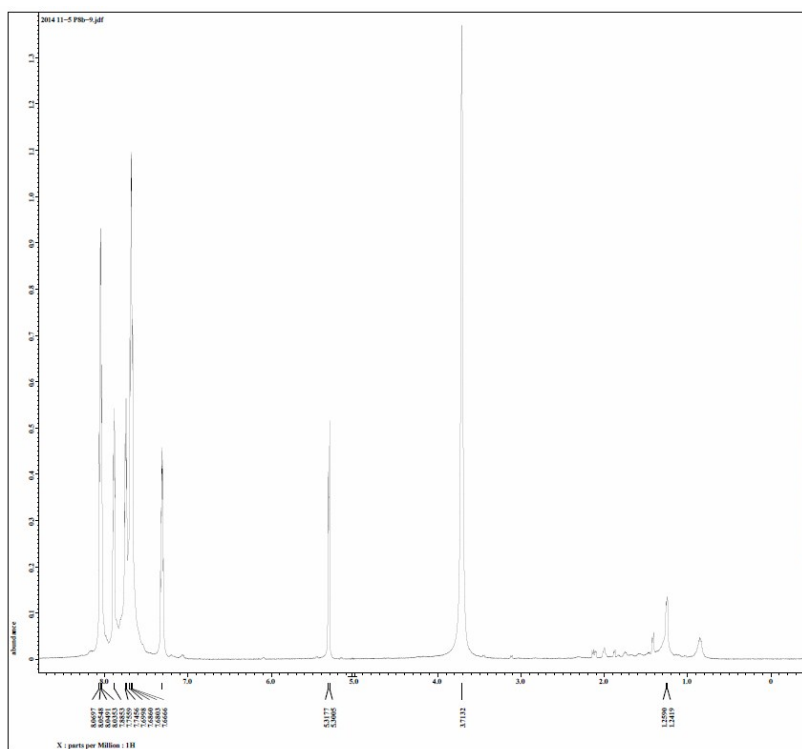

Figure S5.  $^1\text{H}$  NMR of  $5\text{-CF}_3\text{SO}_3$ .

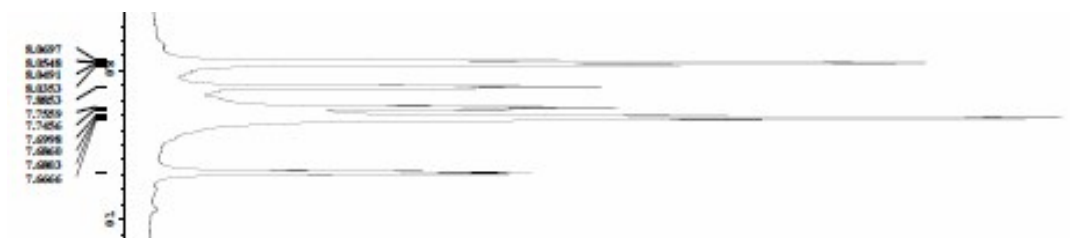

Figure S5'.  $^1\text{H}$  NMR of  $5\text{-CF}_3\text{SO}_3$ .

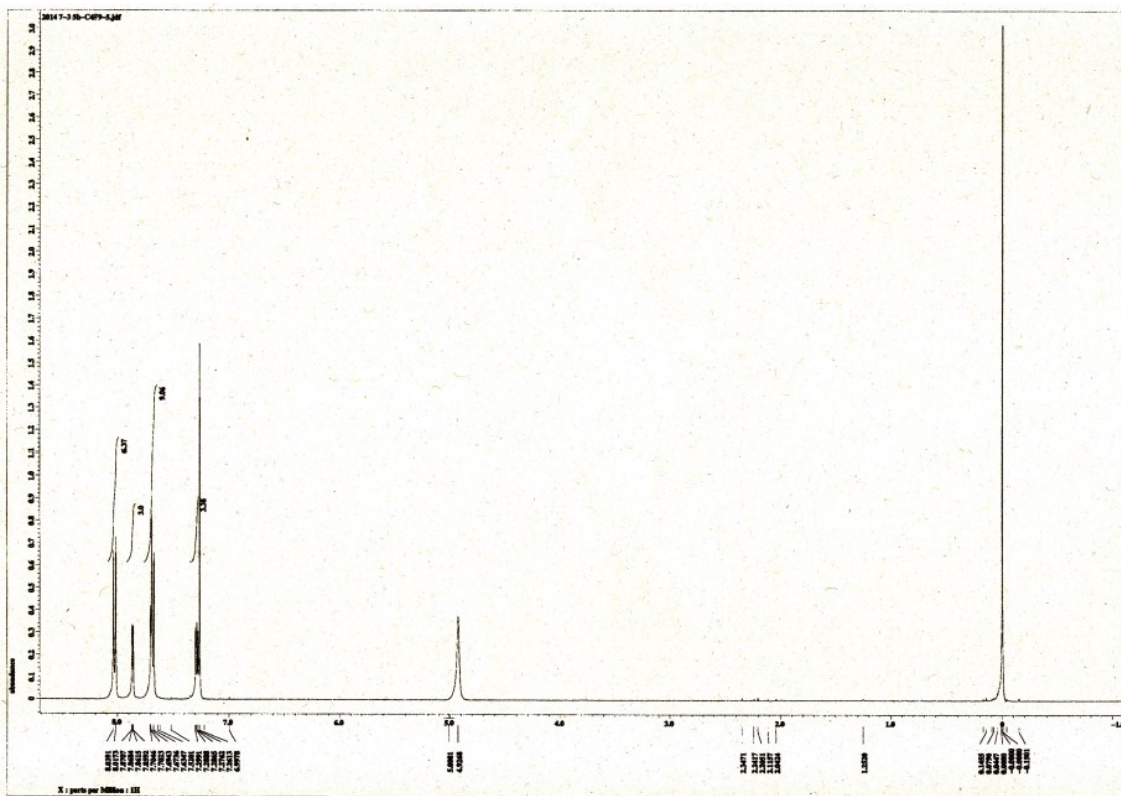

Figure S6.  $^1\text{H}$  NMR of  $5\text{-(C}_4\text{F}_9\text{SO}_2)_2\text{N}$ .

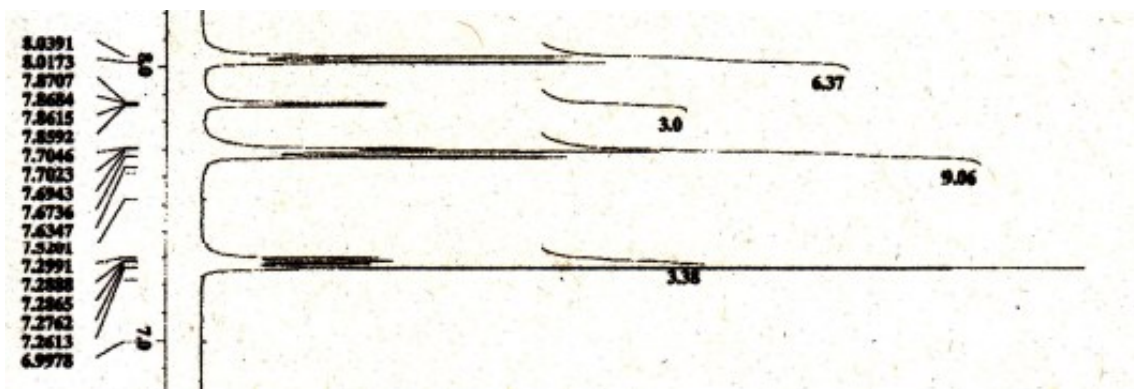

Figure S6'.  $^1\text{H}$  NMR of  $5\text{-(C}_4\text{F}_9\text{SO}_2)_2\text{N}$ .



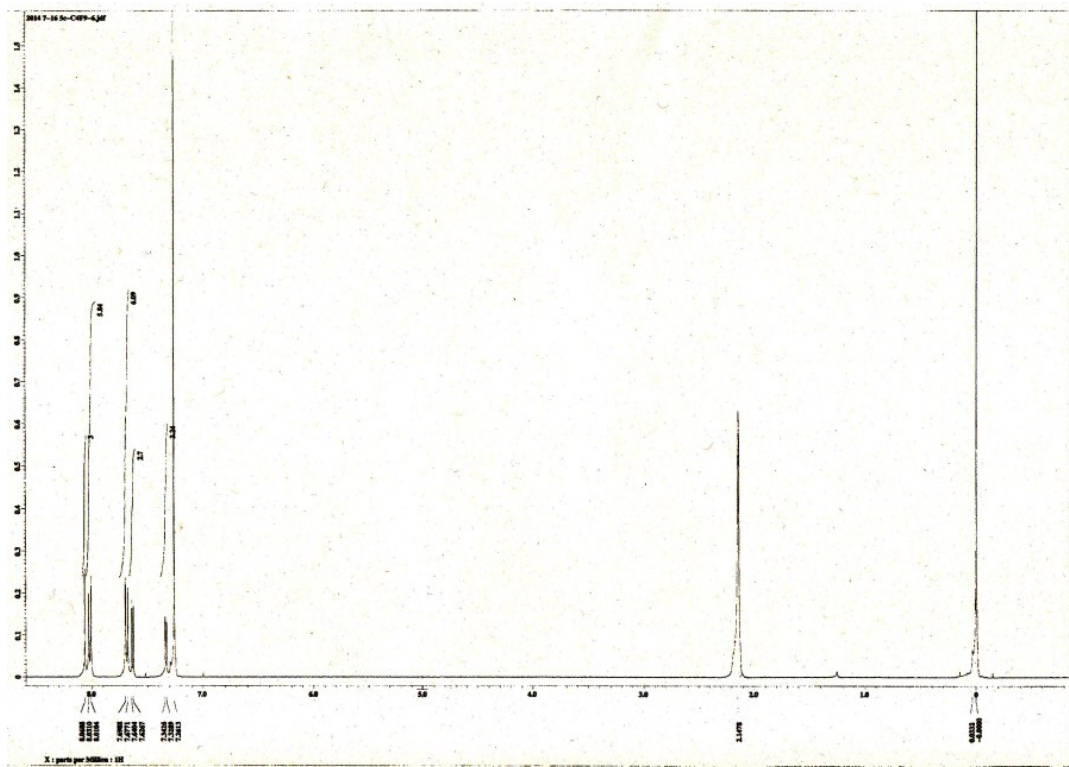

Figure S7.  $^1\text{H}$  NMR of  $6-(\text{C}_4\text{F}_9\text{SO}_2)_2\text{N}$ .

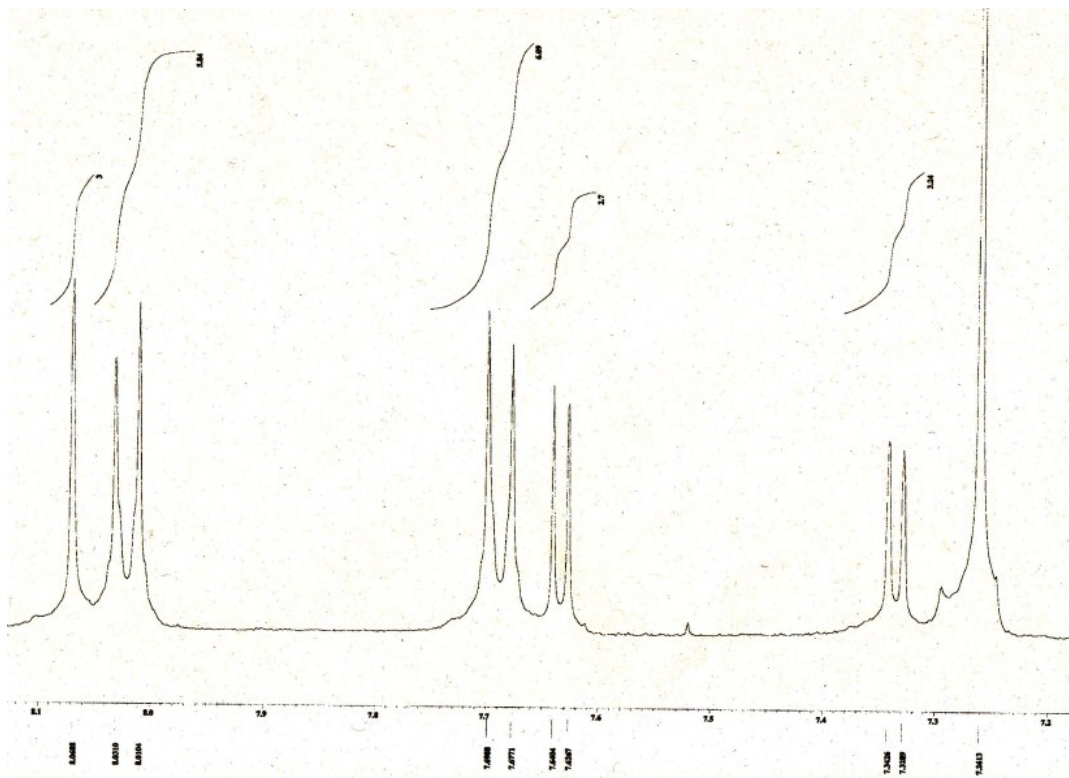

Figure S7'.  $^1\text{H}$  NMR of  $6-(\text{C}_4\text{F}_9\text{SO}_2)_2\text{N}$ .

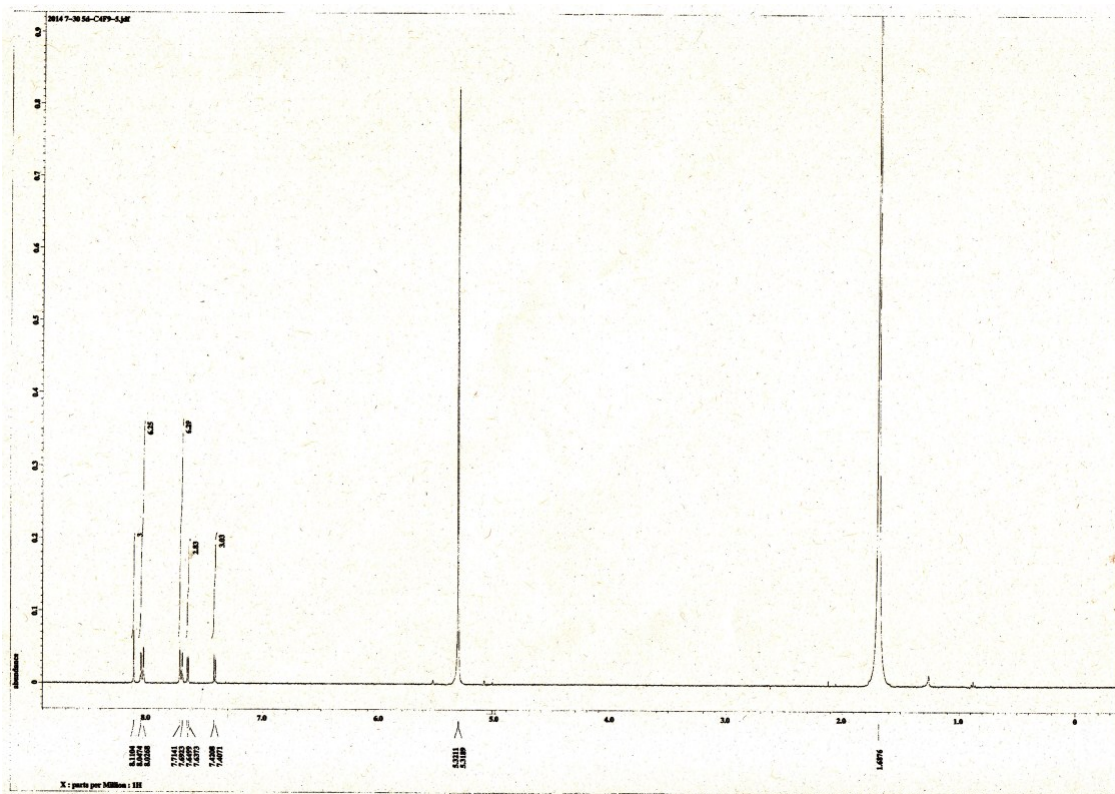

Figure S8. <sup>1</sup>H NMR of 7-(C<sub>4</sub>F<sub>9</sub>SO<sub>2</sub>)<sub>2</sub>N.

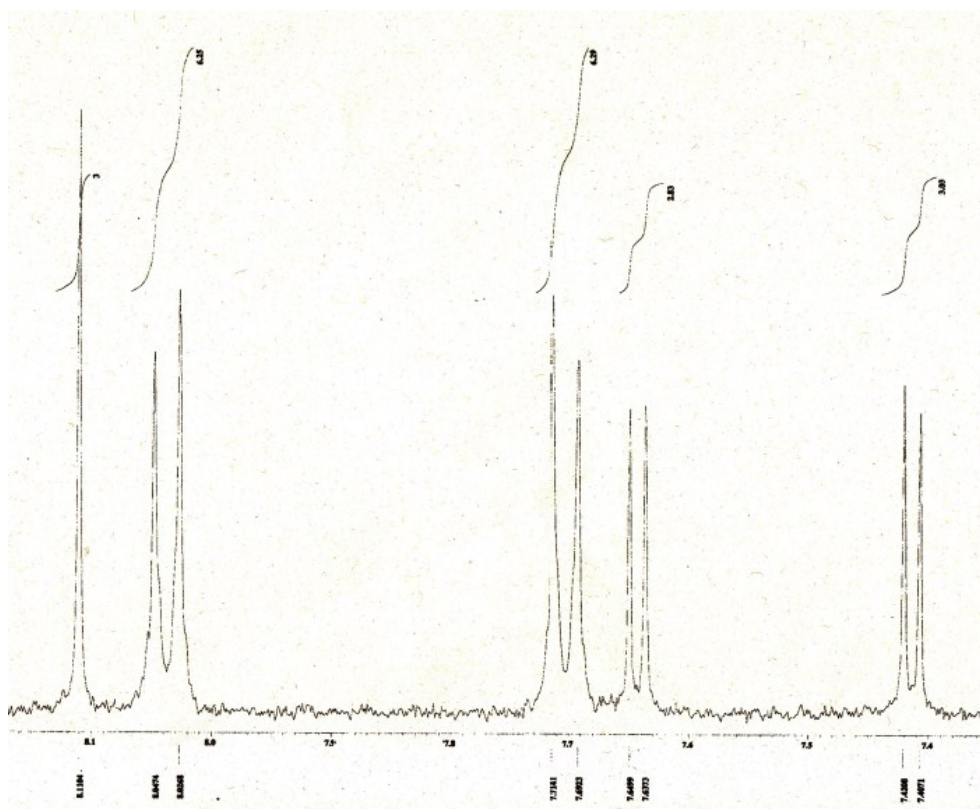

Figure S8'. <sup>1</sup>H NMR of 7-(C<sub>4</sub>F<sub>9</sub>SO<sub>2</sub>)<sub>2</sub>N.

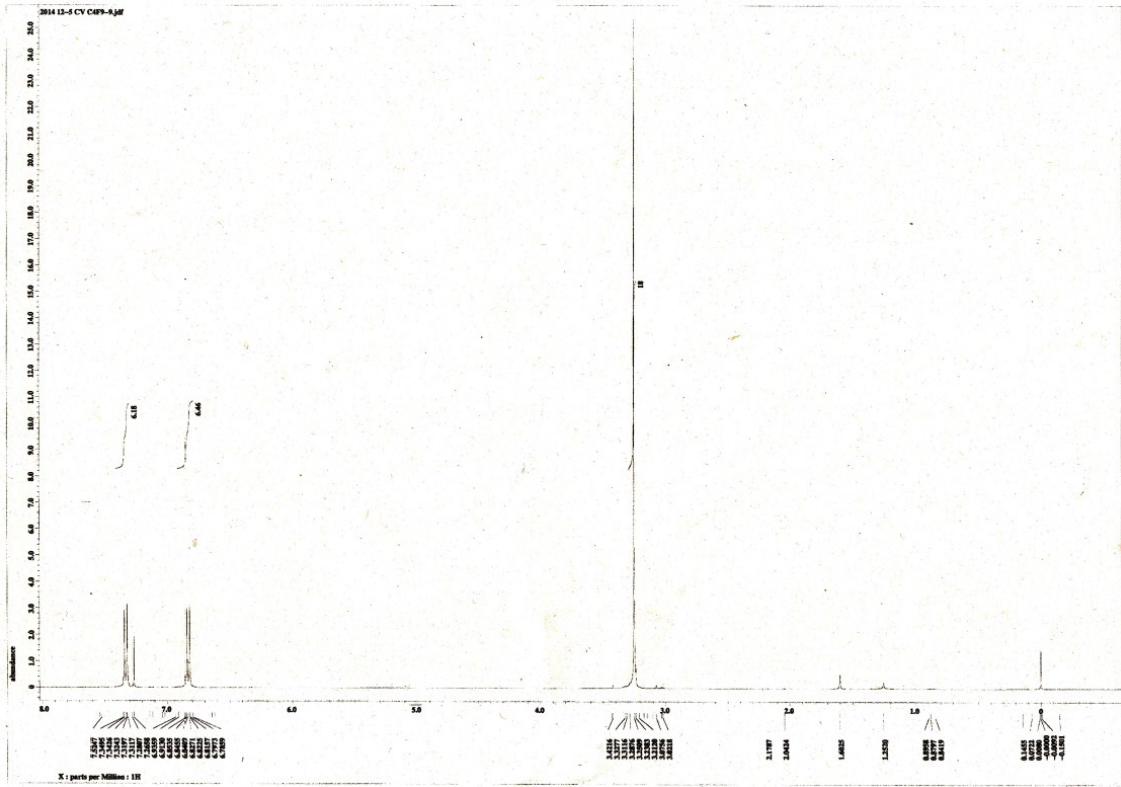

Figure S9.  $^1\text{H}$  NMR of  $\text{CV}-(\text{C}_4\text{F}_9\text{SO}_2)_2\text{N}$ .

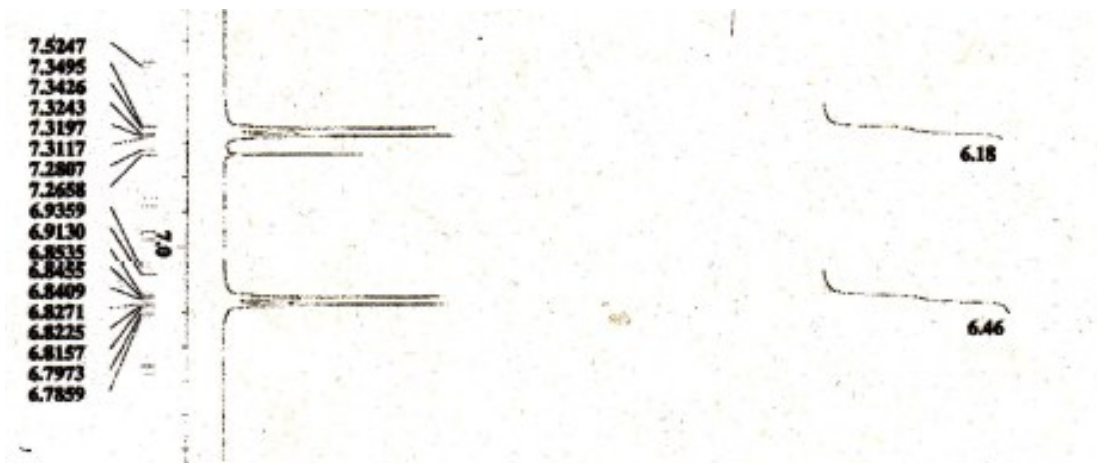

Figure S9'.  $^1\text{H}$  NMR of  $\text{CV}-(\text{C}_4\text{F}_9\text{SO}_2)_2\text{N}$ .

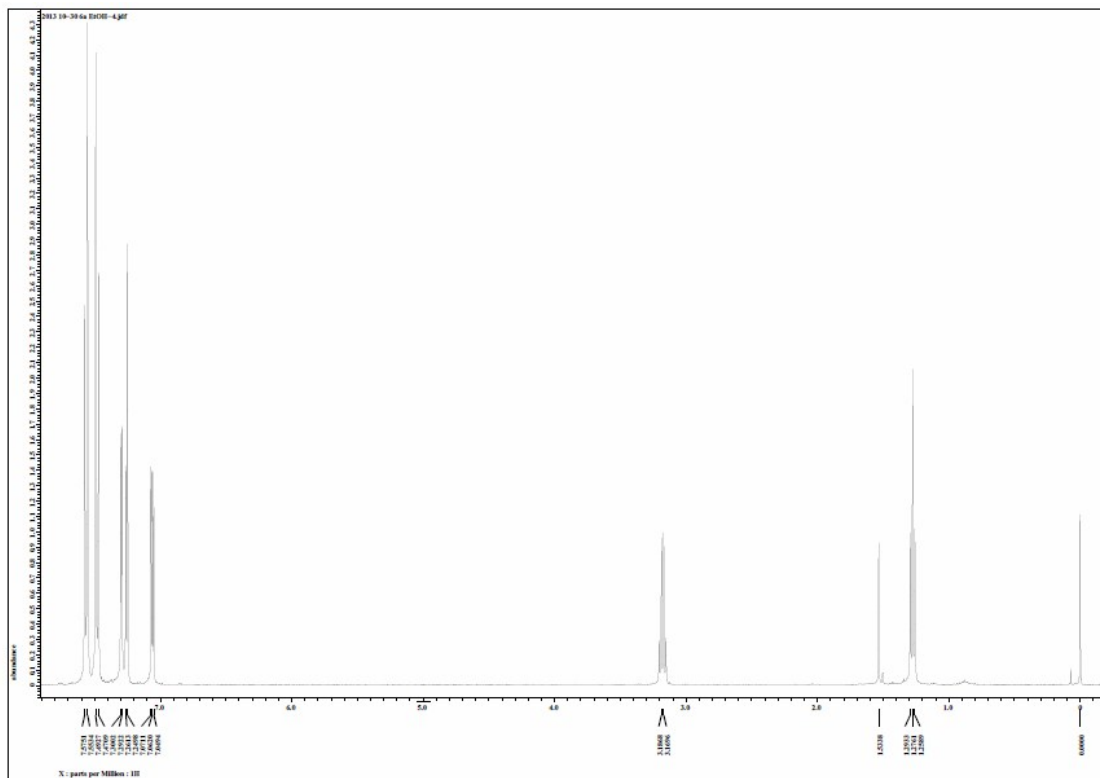

Figure S10.  $^1\text{H}$  NMR of **5-OEt**.

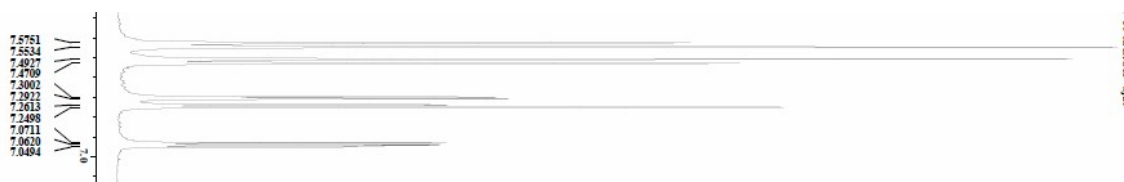

Figure S10'.  $^1\text{H}$  NMR of **5-OEt**.

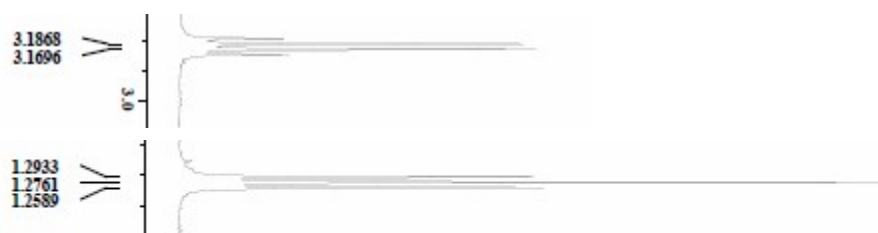

Figure S10''.  $^1\text{H}$  NMR of **5-OEt**.
